# Supplementary material for: Single-cell transcriptomic profiling reveals immune cell heterogeneity in acute myeloid leukaemia peripheral blood mononuclear cells after chemotherapy
Source: Springer Nature journal article supplement (doi:10.1007/s13402-023-00853-2), 2023-08-24

**a****AML2**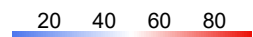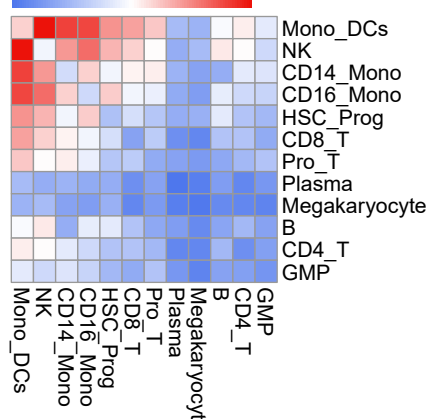**AML3**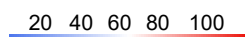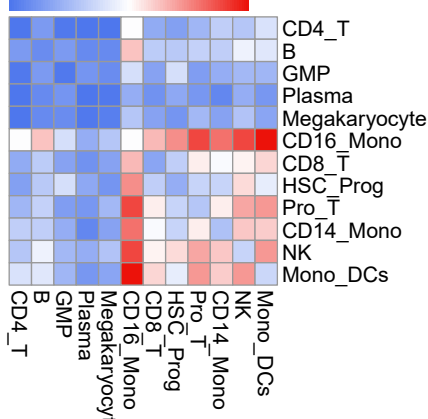**AML3B**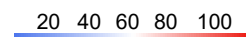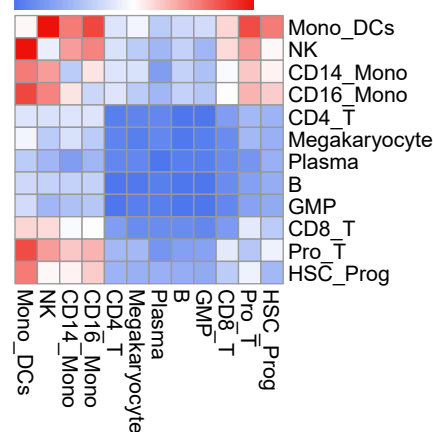**AML4**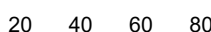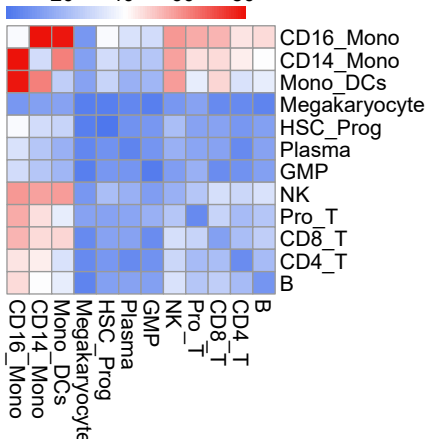**AML5**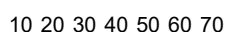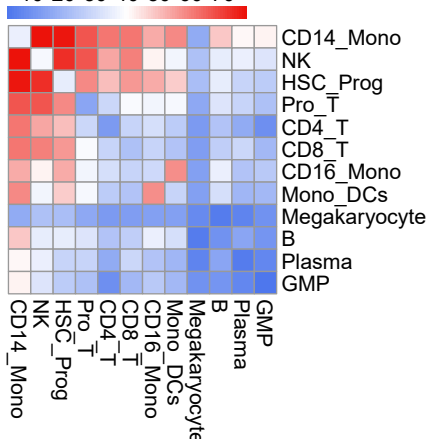**b****AML2**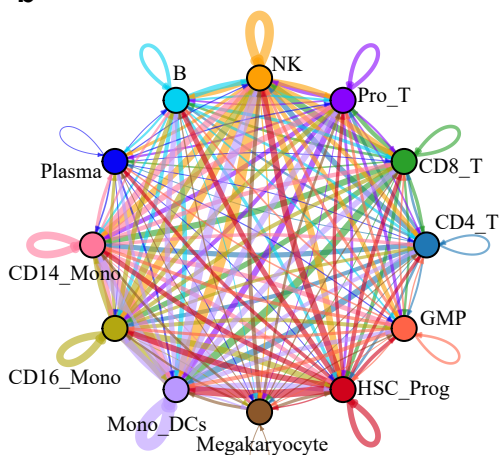**AML3**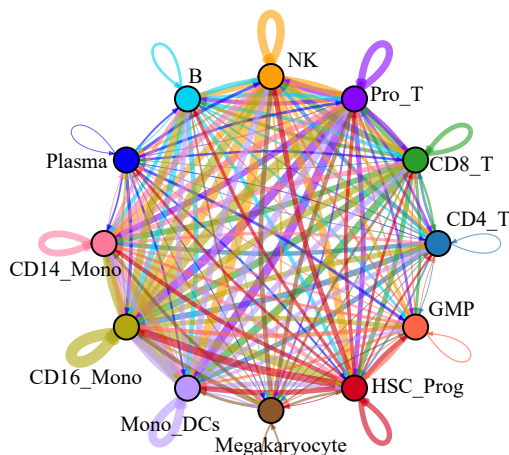**AML3B**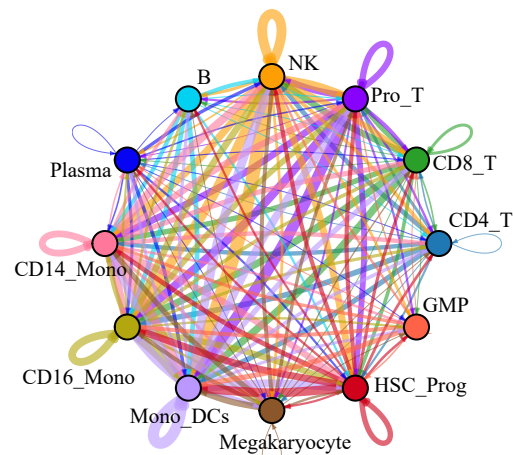**AML4**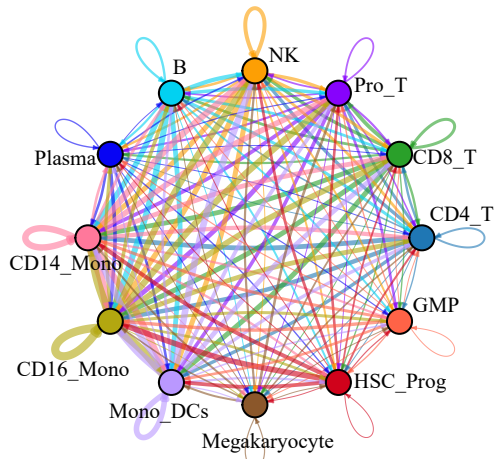**AML5**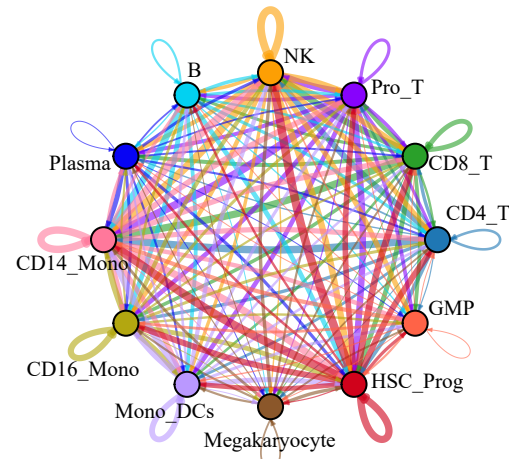

Supplement: MOESM10 [file 25959142]
