# Supplementary material for: Single-cell transcriptomic profiling reveals immune cell heterogeneity in acute myeloid leukaemia peripheral blood mononuclear cells after chemotherapy
Source: PubMed Central journal article supplement (PMC10899424; doi:10.1007/s13402-023-00853-2), 2023-08-24

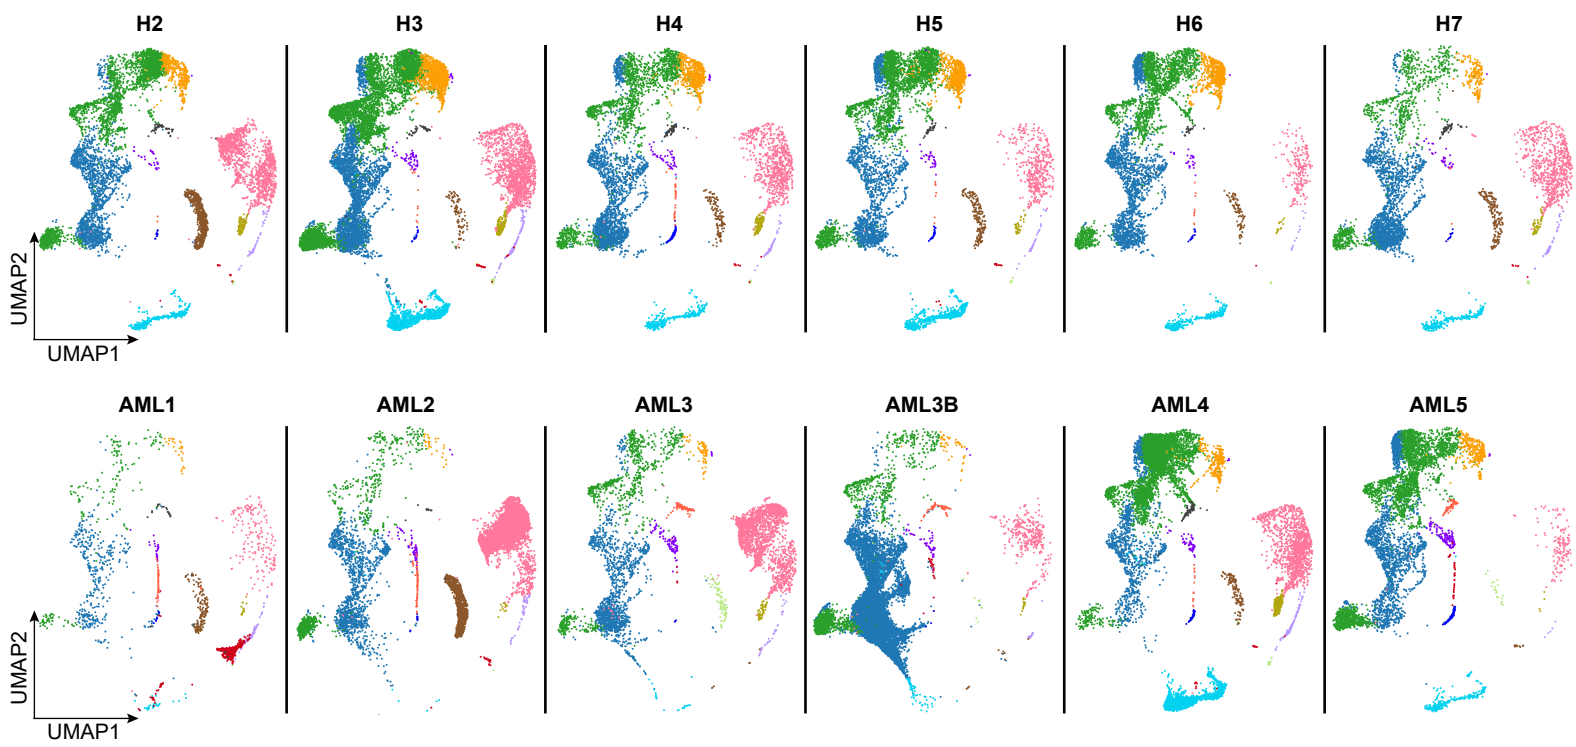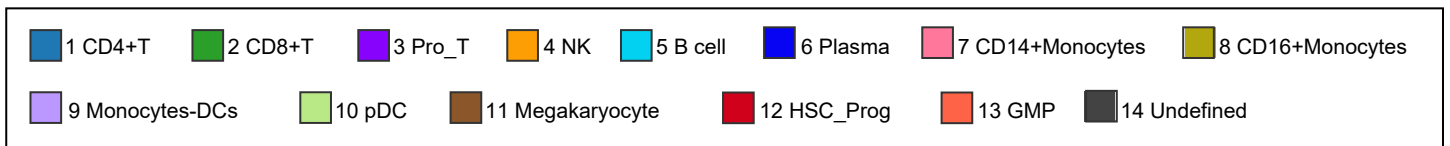

Supplement: 13402_2023_853_MOESM4_ESM.pdf [file 13402_2023_853_MOESM4_ESM.pdf]
