# Supplementary material for: Single-cell transcriptomic profiling reveals immune cell heterogeneity in acute myeloid leukaemia peripheral blood mononuclear cells after chemotherapy
Source: Springer Nature journal article supplement (doi:10.1007/s13402-023-00853-2), 2023-08-24

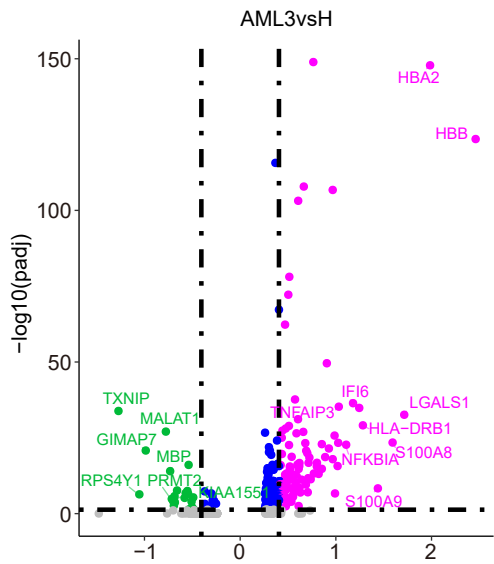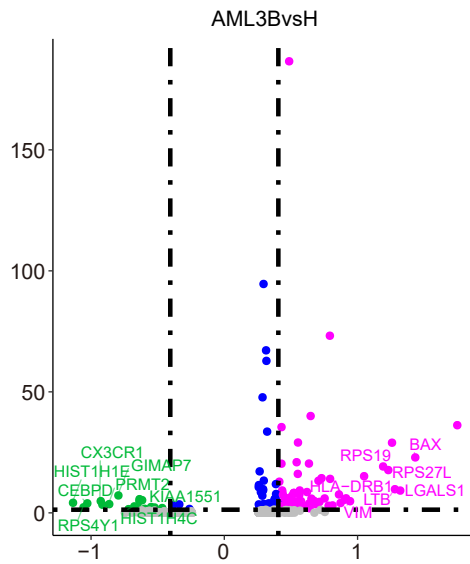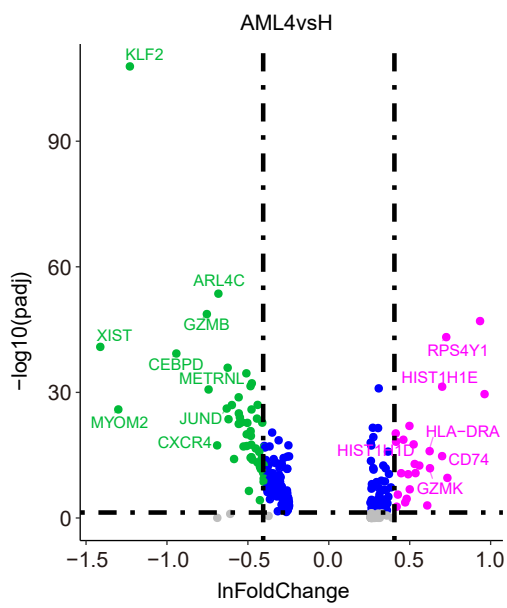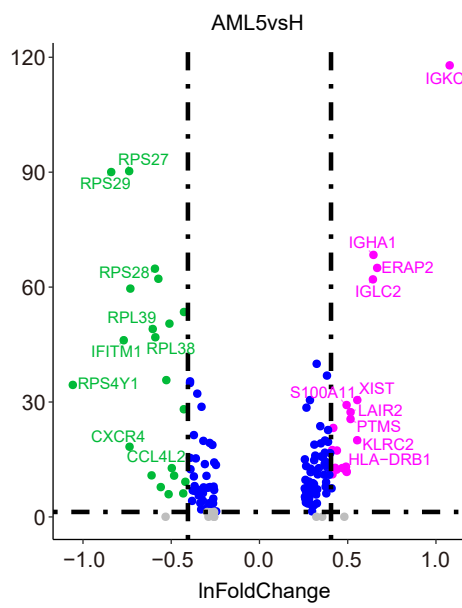

Supplement: MOESM8 [file 25959142]
